# Supplementary material for: Converting health risks into loss of life years - a paradigm shift in clinical risk communication
Source: Aging (Albany NY). 2021 Sep 7;13(17):21513–25. doi: 10.18632/aging.203491 (PMC8457574; doi:10.18632/aging.203491)
Supplement: Supplementary Table 2 [file aging-13-203491-s002.pdf]

## SUPPLEMENTARY TABLE

**Supplementary Table 2. Proportion of subjects with risk(s) losing 4 years or more in the cohort.**

|                  | <b>Men</b> | <b>Women</b> | <b>Total</b> |
|------------------|------------|--------------|--------------|
| ≥ 1 risk factor  | 88.7%      | 94.1%        | 91.5%        |
| ≥ 2 risk factors | 63.7%      | 72.8%        | 68.4%        |
| ≥ 3 risk factors | 38.5%      | 43.2%        | 40.9%        |
| ≥ 4 risk factors | 20.6%      | 20.7%        | 20.6%        |
| ≥ 5 risk factors | 9.8%       | 8.8%         | 9.2%         |
